# Supplementary material for: Post-fast refeeding enhances intestinal stem cell-mediated regeneration and tumourigenesis through mTORC1-dependent polyamine synthesis
Source: Research Square preprint supplement (doi:10.21203/rs.3.rs-2320717/v1), 2023-01-10
Supplement: Supplementary file 1 [file 604808e0862d32d206c91995.pdf]

# Extended Data Figure 2

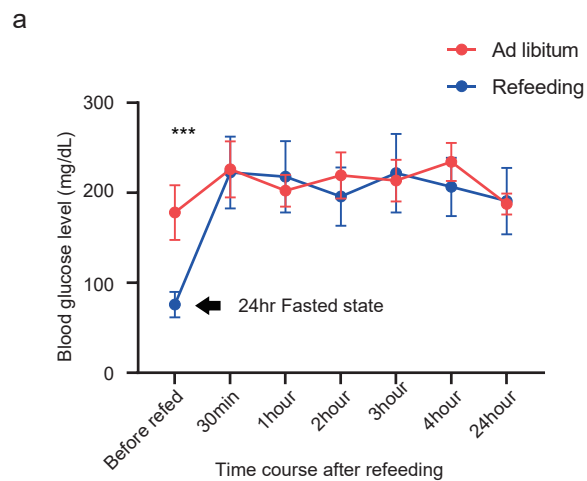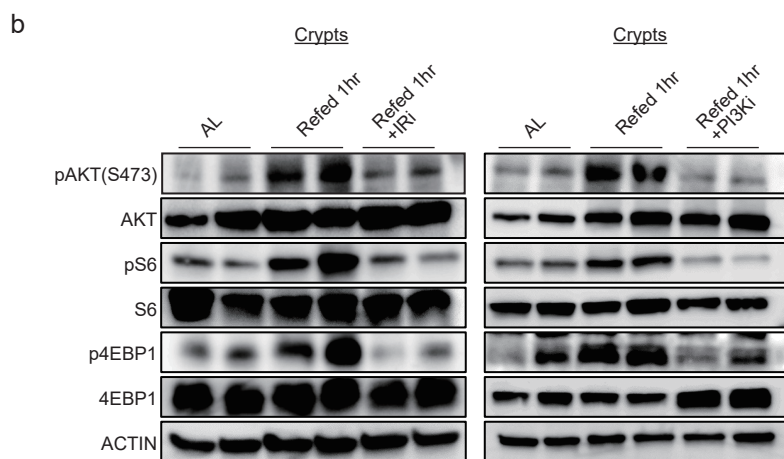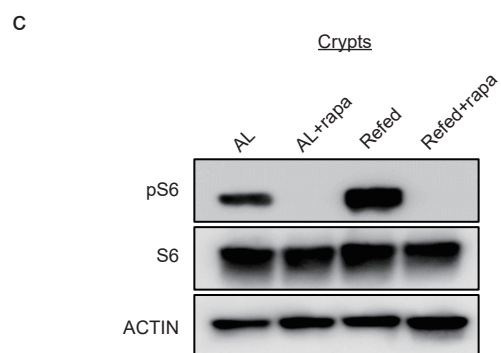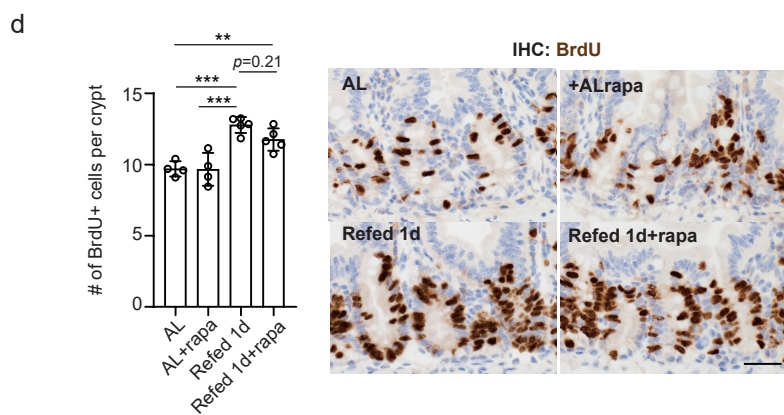

**Extended Data Fig. 2 Insulin-PI3K signal is a trigger to activate mTORC1 signal after refeeding**

- (a) Timeline of blood glucose levels from tail-tip samples pre and post-refeeding. n = 4 mice per group.
- (b) Protein amount of phospho-AKT and mTORC1 downstream proteins by immunoblots in crypts from AL, Refed 1h and Refed 1h treated with OSI-906 (left) or BKM120 mice (right).
- (c) Protein level of phospho-S6, total S6, and ACTIN in crypts from AL, Refed 1d with or without rapamycin treatment.
- (d) Quantification of BrdU<sup>+</sup> cells per jejunal crypt from AL and Refed 1d with or without rapamycin treatment (left), and representative images of IHC for BrdU (right). Scale bar, 25  $\mu$ m.

Data in dot plots were expressed as mean  $\pm$  SD. \*\*p < 0.01, \*\*\*p < 0.001, Student's *t*-test for (a), one-way ANOVA for (d).
