# Supplementary material for: Post-fast refeeding enhances intestinal stem cell-mediated regeneration and tumourigenesis through mTORC1-dependent polyamine synthesis
Source: Research Square preprint supplement (doi:10.21203/rs.3.rs-2320717/v1), 2023-01-10
Supplement: Supplementary file 3 [file 888ca1802050534e431807f2.pdf]

# Extended Data Figure 4

a

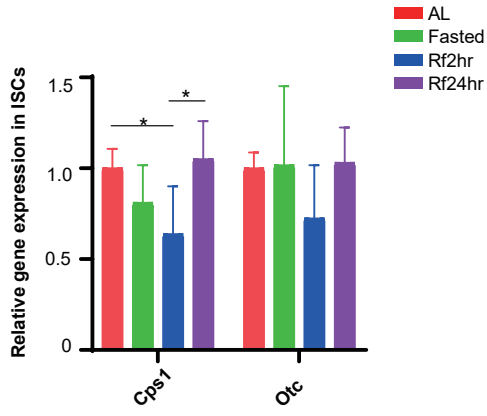

b

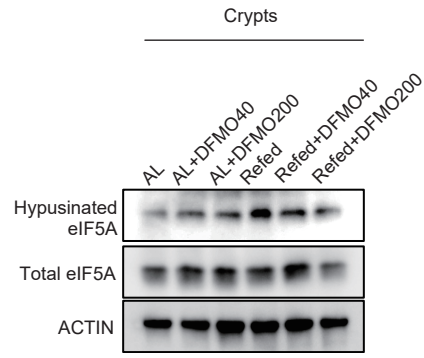

c

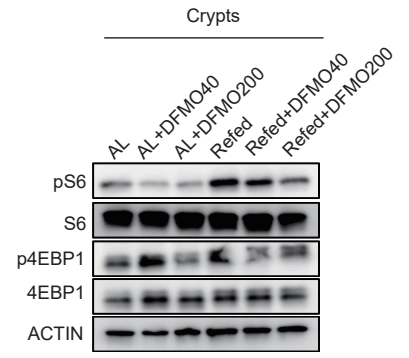

**Extended Data Fig. 4 DFMO treatment inhibits the hypusination of eIF5A as well as mTORC1 activity**

- (a) qPCR with FACS sorted ISCs from *Lgr5-EGFP-IRES-creERT2* mice.
- (b) Protein level of hypusinated eIF5A, total eIF5A, and ACTIN in crypt cells from AL and Refed with or without DFMO treatment. DFMO 40, 200: DFMO 40mg/kg, 200mg/kg
- (c) Protein amount of mTORC1 signal in the crypt from AL and Refed mice with or without DFMO treatment.
