# Supplementary material for: Post-fast refeeding enhances intestinal stem cell-mediated regeneration and tumourigenesis through mTORC1-dependent polyamine synthesis
Source: Research Square preprint supplement (doi:10.21203/rs.3.rs-2320717/v1), 2023-01-10
Supplement: Supplementary file 4 [file c0fe6cd14f8b4acf44124d69.pdf]

a

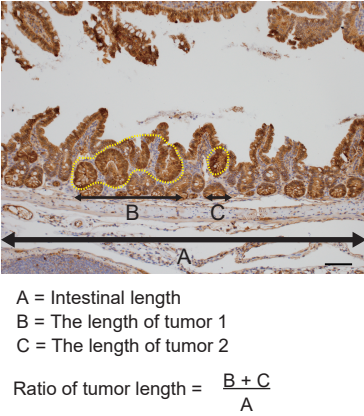

b

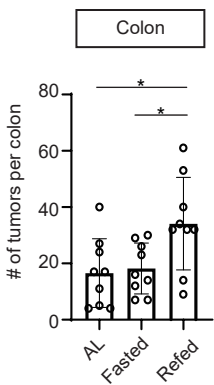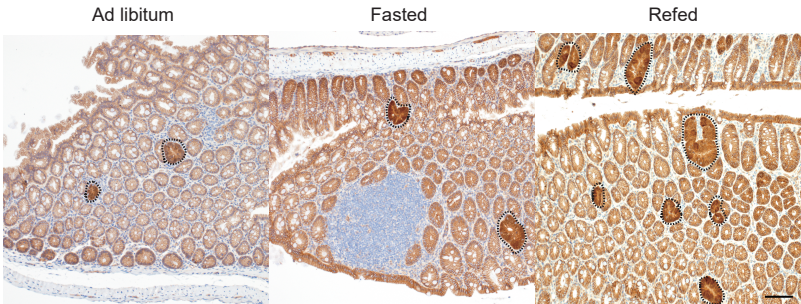

c

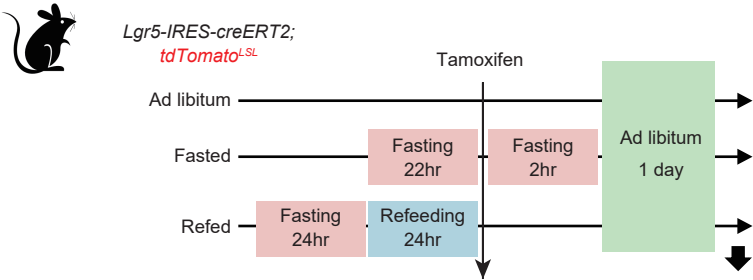

d

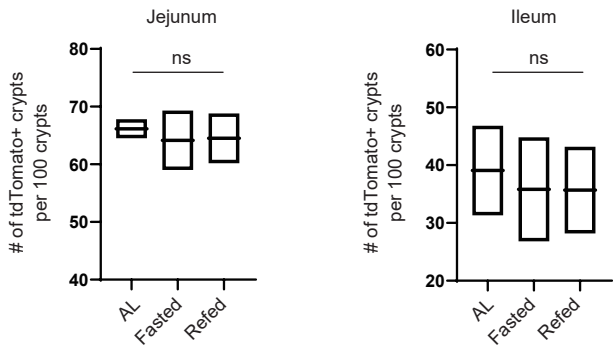

e

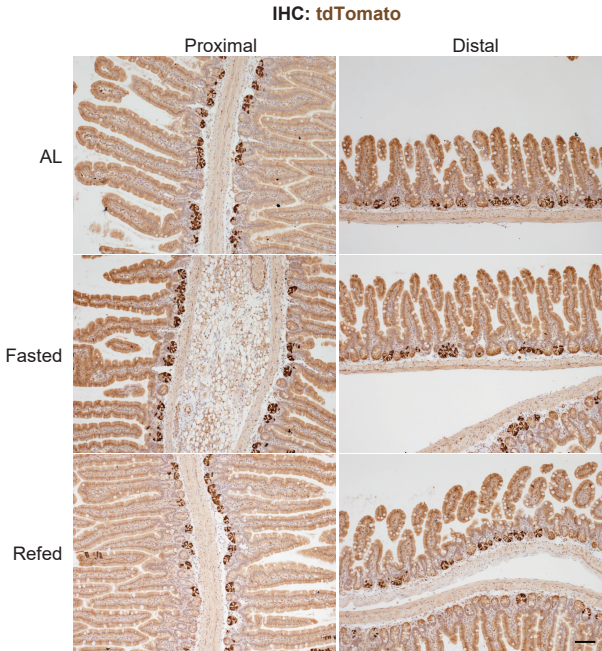

f

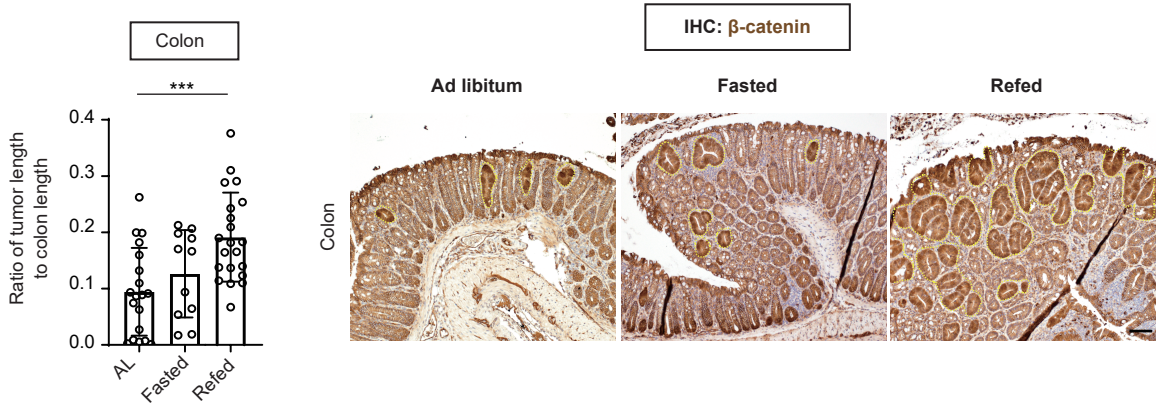

**Extended Data Fig. 5 Post-fast refeeding augments the tumourigenicity in colon**

- (a) Schematic of the tumour measurement, Scale bar, 50  $\mu\text{m}$ .
- (b) The number of  $\beta$ -catenin<sup>+</sup> *Apc*-null tumours in colon from *Apc*<sup>loxp/loxp</sup>; *Lgr5-EGFP-IRES-creERT2* mice (left), and representative *Apc*-null tumour lesion by IHC for  $\beta$ -catenin (black dot circle, right). Scale bar, 50  $\mu\text{m}$ .
- (c) Schematic of *Cre* recombinase activity with *Lgr5-IRES-CreERT2*; *Rosa26*<sup>LSL-tdTomato</sup> reporter mice.
- (d) Quantification of the number of tdTomato<sup>+</sup> crypts the from jejunum (left) and ileum (right) samples. n=3.
- (e) Representative images of tdTomato<sup>+</sup> crypt from jejunum (left) and ileum (right) . Scale bar, 50  $\mu\text{m}$ .
- (f) Ratio of  $\beta$ -catenin<sup>+</sup> *Apc*-null tumour length in colon of *Apc*<sup>loxp/loxp</sup>; *Villin-creERT2* mice (left), and representative *Apc*-null tumours by IHC for  $\beta$ -catenin. Tumours are surrounded by a yellow dotted line (right). Scale bar, 50  $\mu\text{m}$ .

Data in dot plots were expressed as mean  $\pm$  SD. \* $p < 0.05$ , \*\*\* $p < 0.001$ , NS; not significant, one-way ANOVA
